1 **Genomic surveillance unfolds the dynamics of SARS-CoV-2 transmission and**  
2 **divergence in Bangladesh over the past two years**

3

4 Tushar Ahmed Shishir<sup>a, b</sup>, Taslimun Jannat<sup>a</sup>, Iftekhar Bin Naser<sup>a#</sup>

5

6 <sup>a</sup>Department of Mathematics and Natural Sciences, BRAC University, Dhaka – 1212,

7 Bangladesh.

8 <sup>b</sup>Rangamati General Hospital, Rangamati – 4500, Chattogram, Bangladesh.

9

10 **Running Head:** SARS-CoV-2 transmission and divergence in Bangladesh

11

12 #Address correspondence to:

13 Iftekhar Bin Naser,

14 Email: [iftekhar.naser@bracu.ac.bd](mailto:iftekhar.naser@bracu.ac.bd)

15

16 **Word count –**

17 1. Abstract – 187

18 2. Importance – 147

19 3. Introduction – 738

20 4. Results – 2245

21 5. Discussion – 874

22 6. Materials and Methods – 346

## 23 **Abstract**

24 The highly pathogenic virus SARS-CoV-2 has shattered the healthcare system of the world causing  
25 the COVID-19 pandemic since first detected in Wuhan, China. Therefore, scrutinizing the genome  
26 structure and tracing the transmission of the virus has gained enormous interest in designing  
27 appropriate intervention strategies to control the pandemic. In this report, we examined 4622  
28 sequences from Bangladesh and found that they belonged to thirty-five major PANGO lineages,  
29 while Delta alone accounted for 39%, and 78% were from just four primary lineages. Our research  
30 has also shown Dhaka to be the hub of viral transmission and observed the virus spreading back  
31 and forth across the country at different times by building a transmission network. The analysis  
32 resulted in 7659 unique mutations, with an average of 24.61 missense mutations per sequence.  
33 Moreover, our analysis of genetic diversity and mutation patterns revealed that eight genes were  
34 under negative selection pressure to purify deleterious mutations, while three genes were under  
35 positive selection pressure.

## 36 **Importance**

37 With 29,122 deaths, 1.95 million infections and a shattered healthcare system from SARS-CoV-2  
38 in Bangladesh, the only way to avoid further complications is to break the transmission network  
39 of the virus. Therefore, it is vital to shedding light on the transmission, divergence, mutations, and  
40 emergence of new variants using genomic data analyses and surveillance. Here, we present the  
41 geographic and temporal distribution of different SARS-CoV-2 variants throughout Bangladesh  
42 over the past two years, and their current prevalence. Further, we have developed a transmission  
43 network of viral spreads, which in turn will help take intervention measures. Then we analyzed all  
44 the mutations that occurred and their effect on evolution as well as the currently present mutations  
45 that could trigger a new variant of concern. In short, together with an ongoing genomic surveillance

46 program, these data will help to better understand SARS-CoV-2, its evolution, and pandemic  
47 characteristics in Bangladesh.

48

49 **Keywords:** SARS-CoV-2; COVID-19; Genetic diversity; Molecular surveillance; Evolution;  
50 Pandemic

51

## 52 **Introduction**

53 The Coronavirus disease (COVID-19) pandemic was initially reported as an unknown respiratory  
54 illness towards the end of 2019. However, it eventually became evident that a novel SARS-like  
55 coronavirus was causing the infections and the virus was termed severe acute respiratory syndrome  
56 coronavirus 2 (SARS-CoV-2) (1). Originating in Wuhan, China, SARS-CoV-2 has spread across  
57 220 countries and territories, infecting 488.75 million and causing the death of 6.17 million people  
58 till 31st March 2022, resulting in a global economic crisis, which is the third zoonotic virus after  
59 MERS-CoV and SARS-CoV in 2012 and 2002 respectively (2, 3). The novel virus belonging to  
60 the Betacoronavirus genus and Coronaviridae family is a positive-sense, single-stranded ~30 kb  
61 long RNA virus. Its genome contains 38% GC content (4), prefers pyrimidine-rich codons over  
62 purines (5) and is organized into 11 open reading frames expressing 12 proteins, including two  
63 polypeptides, four structural proteins and other accessory proteins (6). Phylogenetically, the virus  
64 shares 96% identity with the strain BatCoV RaTG13 of *Rhinolophus affinis*, and genome  
65 sequences along with epidemiological data suggest that SARS-CoV-2 is primarily transmitted  
66 from bats to humans (3, 4, 7). A complete genome sequence of the virus was deposited in GenBank  
67 on 5th January (NC\_045512.2) (8), followed by the submission of 9.74 million complete  
68 sequences to GISAID by 25th March 2022 (9).

69 According to recent data from Worldometer, the most infected countries are the USA, India, and  
70 Brazil, with more than 29, 43, and 33 million cases of infection and thousands of deaths (2, 10).  
71 Since the first case was confirmed in Bangladesh on 8th March 2020, there have been 1.95 million  
72 positives and 29,122 deaths reported until 31st March 2022 (11). Having such a large population  
73 makes Bangladesh more vulnerable to viral transmission, and it is labelled as the second-most  
74 infected nation in the South Asian region (10), despite the government imposing lockdowns, social  
75 distancing rules and mask mandates to control the situation. Therefore, it is crucial to shed light  
76 on the transmission and evolution of the virus inside the country to reduce the fatality where  
77 genomic data analyses and surveillance comes into play, which can deliver immense information.  
78 Child Health Research Foundation published the first SARS-CoV-2 genome sequence from  
79 Bangladesh on 12th May 2020 (12), followed by 5146 further sequences until 25th March 2022  
80 (9).

81 To date, Bangladesh has been affected by three waves of COVID-19 with variants of concerns  
82 (VOC), including Alpha, Beta, Delta, and Omicron (9). VOC is the name given to a variant of the  
83 SARS-CoV-2 virus that has mutations in the spike protein receptor-binding domain, increasing  
84 binding affinity within the RBD-hACE2 complex and increasing viral transmission (13, 14).  
85 Consequently, the mutations are essential for studying since they alter the antigenic potentials of  
86 the epitopes and consequently affect pathogenicity, infectivity, transmissibility, and evading host  
87 immunity. SARS-CoV-2 encodes an exoribonuclease that proofreads the errors during viral RNA  
88 synthesis; therefore, it has a lower mutation rate than other RNA viruses, which aids in enhancing  
89 its ability to adapt to their environment (15, 16). Nevertheless, the virus is accumulating mutations  
90 across its genome, leading to the emergence of different variants over time. These mutations are  
91 not evenly distributed; for example, some genes are more prone to mutations than others are, and

92 cytosine to uracil substitution is more common in SARS-CoV-2, reforming the  
93 transition/transversion ratio, which is negatively correlated with evolutionary time (17).  
94 Additionally, a variable vaccination rate among the countries increases the risk of SARS-CoV-2  
95 mutating into a strain that is resistant to current vaccines and therapies. Consequently, it is essential  
96 to continue investigating the mutations of SARS-CoV-2 in order to develop further effective  
97 vaccines and therapies, improve pandemic response, and reduce the impact of the pandemic on  
98 healthcare and clinical processes.

99 To the best of our knowledge, most previous studies in Bangladesh addressed lineages distribution,  
100 source determination, and potential mutations with only a few sequences from the early phase of  
101 the outbreak (18, 19). Therefore, in this work, we comprehensively analyzed 4622 whole-genome  
102 sequences of SARS-CoV-2 isolated from Bangladesh until 25th March 2022 to understand the  
103 distribution of variants and mutation accumulation trends over the year. We have thoroughly  
104 studied the temporal and geographical distribution of different lineages inside Bangladesh and  
105 built the transmission network to trace their back and forth circulation. To better understand the  
106 evolutionary dynamics of SARS-CoV-2 in Bangladesh over the last two years, we examined the  
107 genetic diversity among strains, gene-wise mutation distribution, and selection pressures.

108

## 109 **Results**

### 110 **SARS-CoV-2 lineage dynamics**

111 To understand the diversity and transmission of the virus, we have confined and analyzed  
112 sequences from all administrative divisions of Bangladesh. There were 5146 sequences submitted  
113 in GISAID till 25th March 2022, but many of them were incomplete and lacked quality. Therefore,  
114 we filtered the sequences based on their completeness, coverage, and gaps, resulting in 4892

115 sequences for downstream analysis (Supplementary file 1). However, when we examined PANGO  
116 Lineages, we observed that there were 93 lineages, many of which carried extremely low numbers  
117 of the sequences. Hence, we further filtered the sequences and kept only the lineages containing  
118 at least ten sequences, resulting in 4622 sequences from 35 lineages. Overall, in the beginning, the  
119 country had strains that belonged to the fewest number of PANGO lineages, but this has changed  
120 over time (Supplementary file 2). Selected sequences belonging to thirty-five different PANGO  
121 lineages provided us with invaluable insight regarding patterns of pandemic and viral spread  
122 (Supplementary file 2). As an example, 78% of the sequences were grouped into four lineages,  
123 where Delta (B.1.617.2) and its three major sub-lineages (AY.X) combined made up the highest  
124 39% of the total sequences, while 20 out of thirty-five lineages held only 9% of sequences even  
125 after we filtered out the lineages with very few sequences. The top ten most prevalent lineages  
126 were found to be B.1.617.2 (23.34%), B.1.1.25 (20.68%), BA.2 (8.57%), B.1.351.3 (7.27%), B.1.1  
127 (2.40%), B.1.1.7 (1.86%), B.1 (1.80%), B.1.351 (1.02%), B.1.36.16 (0.93%) and B.1.1.318  
128 (0.74%).

129

### 130 **Temporal distribution of major lineages**

131 We found that Bangladesh was afflicted by a large number of viruses from 35 different lineages,  
132 with the highest diversification occurring between July and September of 2021 with sequences  
133 from 20 to 23 lineages (supplementary file 2). The early phase of the pandemic in Bangladesh was  
134 started by the introduction of lineage B.1 in March 2020. Multiple occurrences of the introduction  
135 of COVID-19 from different countries have previously been reported; for instance, Dhaka was  
136 first exposed to COVID-19 with strains from the United Kingdom, while Chattogram was exposed  
137 to strains from Saudi Arabia (18). The early phase of the pandemic was generally dominated by

138 imported strains from outside countries, but as the pandemic progressed, mutations changed  
 139 dynamics and the lineage B.1.1.25 took over, with B.1 gradually declining (Fig 1A). B.1.1.25 was  
 140 the highest prevalent strain until January 2021. Later, the Beta variant (B.1.351) was reported in  
 141 November 2020, followed by the Alpha variant (B.1.1.7) in December 2020. The B.1.1.7 lineage  
 142 started talking over the B.1.1.25 lineage following its introduction. This lineage was the most  
 143 frequently detected variant in February 2021, while Beta variants were very less numerous. Despite  
 144 this, a sub-lineage of Beta variants (B.1.351.3) emerged and outnumbered the Alpha variant in  
 145 March 2021 (Supplementary file 2). However, the dominance of B.1.351.3 did not last long due  
 146 to the introduction of the deadly delta variant (B.1.617.2).

147

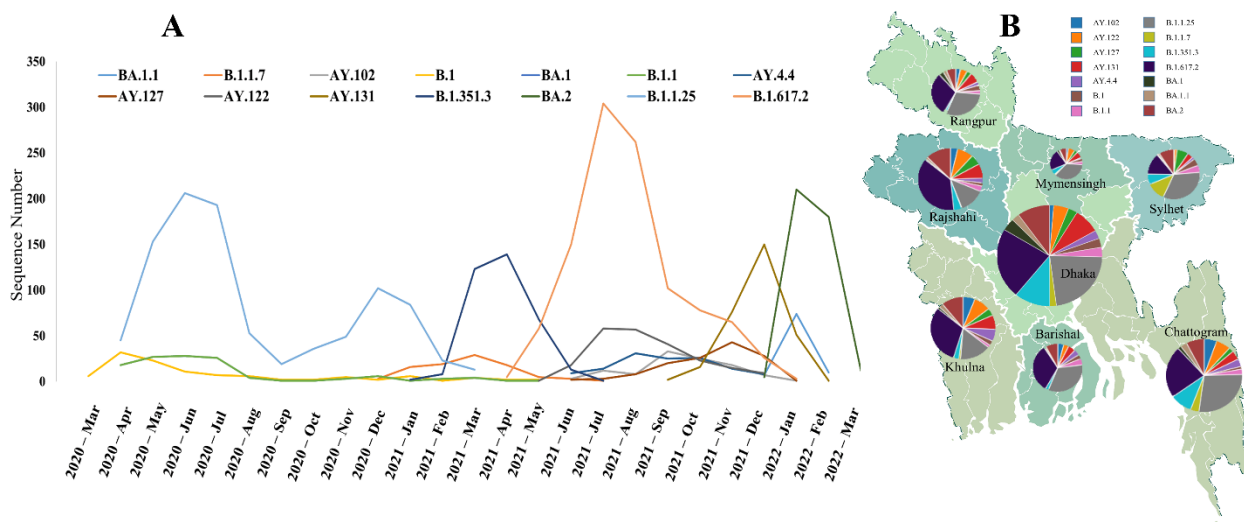

148

149 **Fig 1: Distribution of major lineages in Bangladesh.** **A.** Geographic distribution of major  
 150 lineages at eight administrative divisions of Bangladesh. Dhaka contained the highest number of  
 151 sequences and maximum diversity, while Mymensingh was the least diverse zone. **B.** Temporal  
 152 distribution of major lineages. Maximum diversity was observed after the introduction of the Delta  
 153 variant due to the emergence of different sub-lineage of it. Three major peaks depict the three  
 154 variants responsible for three COVID-19 waves in Bangladesh.

155  
156 According to our analysis, B.1.617.2 was the most dominant strain within a month after its  
157 introduction in April 2021. A number of distinct A lineages have also been observed, which were  
158 mostly sub-lineages of the delta variant, possibly due to the increased transmissibility of the  
159 variant. Specifically, AY.122 increased significantly from September 2021 while B.1.617.2 was  
160 declining. Meanwhile, the AY.131 lineage first appeared in Bangladesh in October 2021 and  
161 dominated all other variants in November 2021; more than half the sequences of December 2021  
162 came from this lineage. This variant was eventually replaced by another highly transmissible  
163 variant called Omicron (B.1.1.529). Omicron first emerged in Bangladesh in December 2021 and  
164 took over within a month. Throughout Bangladesh, the Omicron variant has been dominant since  
165 January 2022.

166  
167 **Regional distribution of different lineages.**

168 We then conducted a chronological lineages dynamics analysis in order to determine whether the  
169 variants were distributed evenly across Bangladesh's administrative divisions. In terms of  
170 geographical distribution, Dhaka had the most diversified sequences from all thirty-five lineages,  
171 followed by Chattogram from 31. On the contrary, Mymensingh and Rangpur were less diverse  
172 areas with sequences from only 22 and 24 lineages, respectively, where most of the lineages  
173 represented only one or two sequences (Fig 1B). The Alpha variant was first detected in the Sylhet  
174 division and has since spread to the other five divisions except for Barishal and Rangpur, where  
175 the Delta and Omicron variant first appeared in Dhaka. Overall, the ratio of the dominating  
176 lineages was similar throughout the country, and our analyzed transmission network reflects that



177 Dhaka was the hub of viral spread (Fig 2). Area-specific detailed chronological distribution of  
178 SARS-CoV-2 variants is provided in the supplementary file (Supplementary file 2).  
179

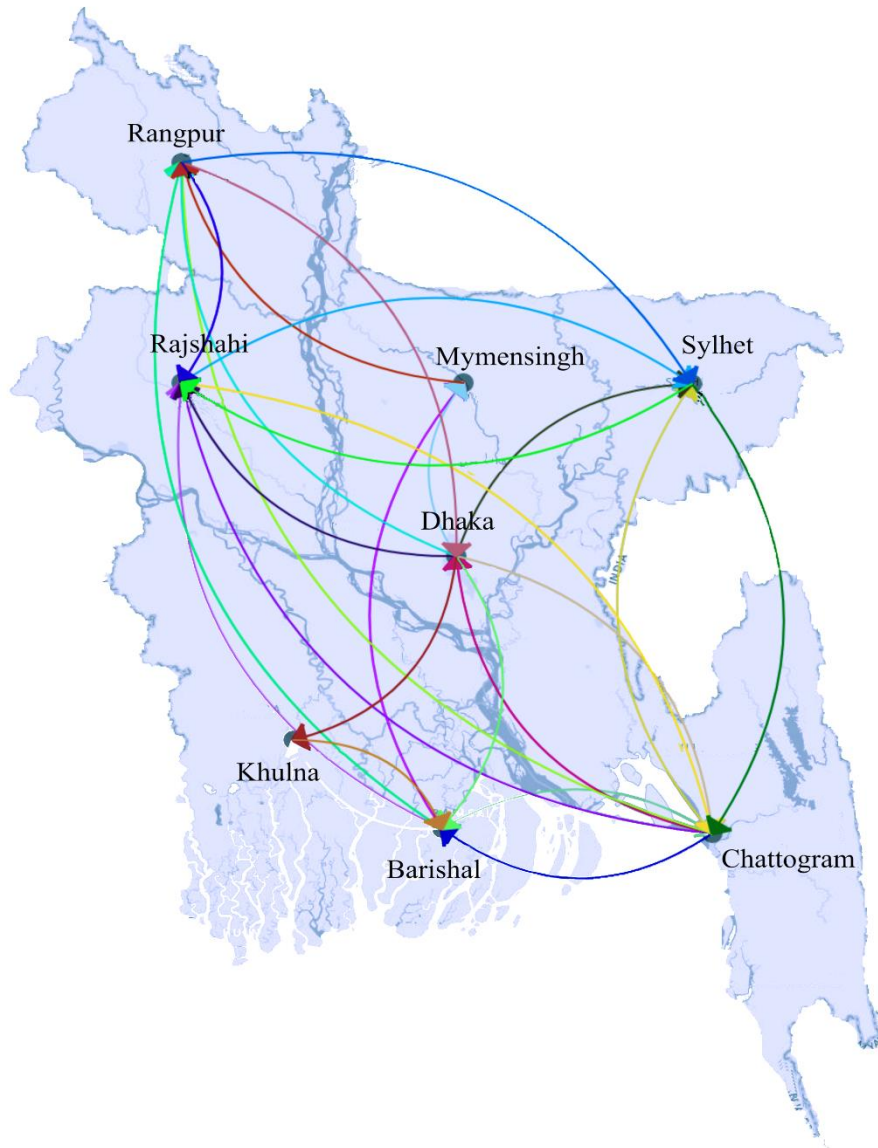

180  
181 **Fig 2: Transmission of SARS-CoV-2 in Bangladesh.** Unlike others, Dhaka was connected with  
182 all other parts of the country, therefore recognized as a viral transmission hub. Arrows at the tip of  
183 the line dictate the direction of transmission.

184 To get a clearer idea of the viral circulation trend and back and forth transmission in different  
185 divisions of the country, we extensively analyzed the variants chronologically. We figured out that  
186 the whole country was mostly filled with a few major lineages throughout the times, but  
187 interestingly their dominance varied. We have seen that some lineages were missing from a  
188 particular area at a particular time and then returned, maybe due to mass people's movement from  
189 other areas. For example, B.1.1 lineages were present in Mymensingh from the very beginning till  
190 June 2020. Then, this variant was missing there for five months but reappeared in the middle of  
191 December 2020. However, the variant was found during this period in Dhaka and Chattogram. On  
192 the other hand, the sub-lineages of Beta variant B.1.351.3 were missing in Sylhet for two months  
193 from February to March 2021 and occurred again in April 2021, while this variant was present in  
194 other divisions during this time. Several other back and forth circulation of strains were observed,  
195 for example, AY.100 and AY.102 in Dhaka. Detailed circulation of the variants information is  
196 provided in the supplementary file (Supplementary file 2).

197

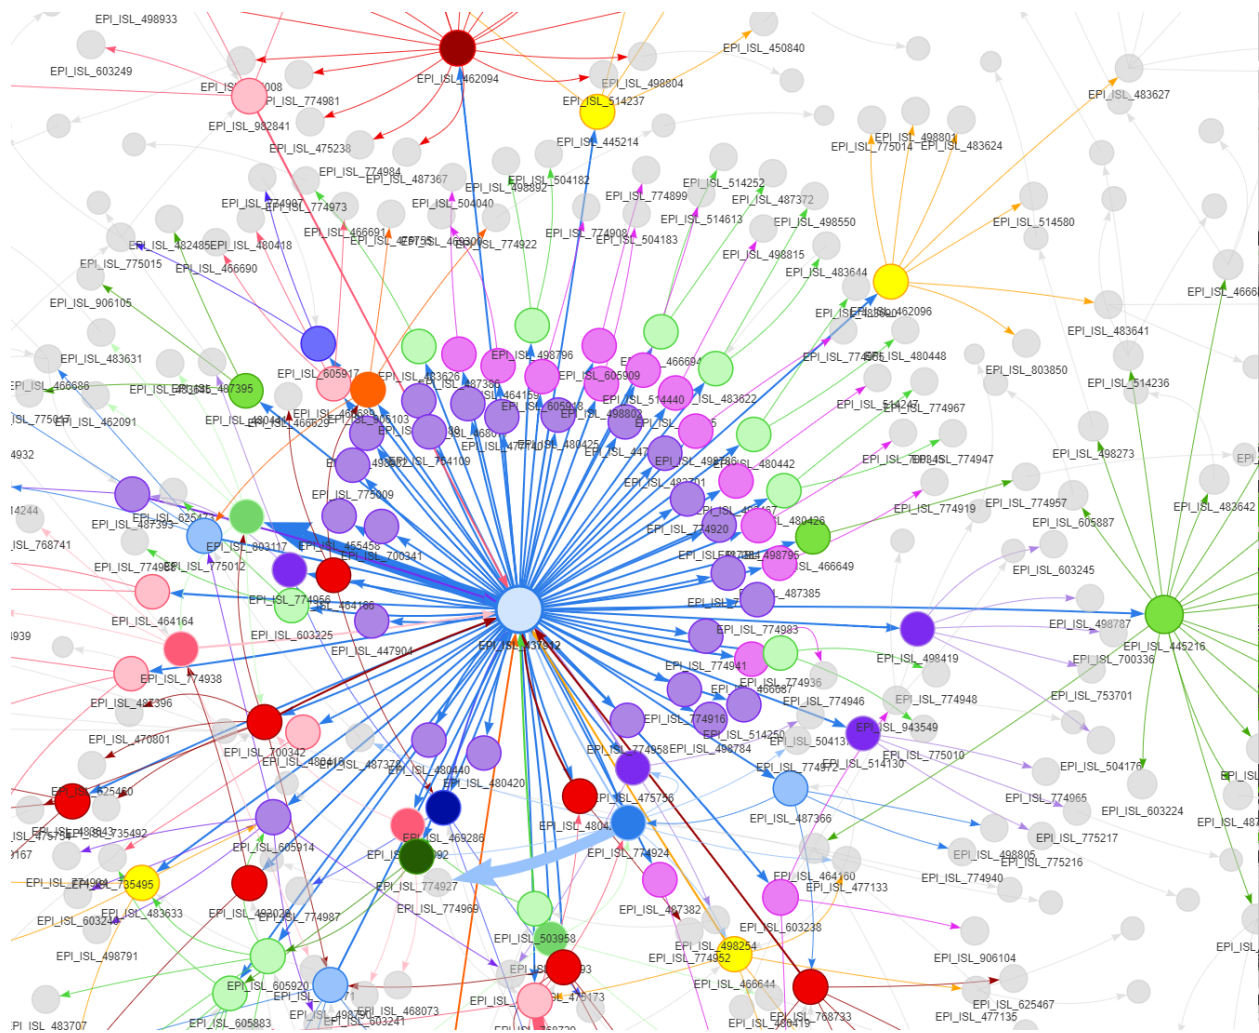

198

199 **Fig 3: Strain to strain transmission network of the SARS-CoV-2 in Bangladesh.** The sizes of

200 nodes are proportional to the number of sequences a cluster contains and the thickness of the lines

201 and arrows represent the frequency of transmission. The arrows reflect the direction of

202 transmission among the viral clusters. The first sequence from the country is at the center of the

203 network, and different clusters originated from the very first sequence, which gave rise to further

204 subgroups; eventually, tips of the network reached.

205

206 Finally, we have built a viral transmission network using all our analysis data set sequences. Dhaka

207 was found to be the center of viral transmission and directly connected with all other locations,

208 while others were not. For example, we did not find any direct connection between Chattogram  
209 with Khulna and Mymensingh, Rangpur with Khulna, and Barisal did not have any connection  
210 with Sylhet (Fig 2). In addition, a strain-specific transmission network reveals the connections  
211 among different clusters and routes of viral spread from root to tip (Fig 3). With the time-calibrated  
212 analysis, we have observed that the sequences from Dhaka remain at the center of the network and  
213 determine the course of transmission forming connections with several subgroups.

214

### 215 **Mutation analysis summary**

216 Till the present study, we have found 7659 unique mutations present in 4622 sequences where 482  
217 were extragenic mutations, and the rest were in the coding regions. In the coding region, a total of  
218 4103 missense, 2865 synonymous, ten insertion, 125 deletion and 74 premature stop codon  
219 mutations were observed (Fig 4A). Moreover, our analysis demonstrated 37.64 mutations per  
220 sequence, where 24.61 mutations were missense, and the ratio of acquiring missense over  
221 synonymous mutations increased gradually (Fig 4B). We have seen the number of mutations  
222 increased gradually over time, yet nearly 29% of the sequences carried mutations below 30, and  
223 more than 55.25% of sequences had 30 to 50 mutations. The highest number of mutations detected  
224 was 78 in two strains isolated from Dhaka on 28<sup>th</sup> February 2022, and the lowest number was only  
225 one found in a sequence from 11<sup>th</sup> May 2021. Fig 4B clearly demonstrates two remarkable rises in  
226 mutations, one in February 2021 due to the introduction of Delta variants. Another sharp rise was  
227 observed in January 2022 because of the highly transmissible Omicron variant with a large number  
228 of mutations in the spike protein. However, the individual genes went through mutation  
229 distinctively. Therefore, we thoroughly carried out the mutational analysis of all the SARS-CoV-  
230 2 sequences from Bangladesh and summarized the results in table 1 and figure 4.

231 **Table 1: SARS-CoV-2 mutation summary on individual genes.**

| ORF    | No. of non-mutant sequences | Percentage of mutated sequences | No. of synonymous mutations | No. of missense mutations | Percentage of missense mutations | Mutation density | No. of frequent mutations (n ≥ 10%) | No. of insertion mutation | No. of deletion mutation | No. of stop codon gained |
|--------|-----------------------------|---------------------------------|-----------------------------|---------------------------|----------------------------------|------------------|-------------------------------------|---------------------------|--------------------------|--------------------------|
| ORF1ab | 1                           | 99.98%                          | 1997                        | 2550                      | 56.08%                           | 21.36%           | 29                                  | 2                         | 33                       | 20                       |
| S      | 2                           | 99.96%                          | 370                         | 590                       | 61.46%                           | 25.12%           | 31                                  | 4                         | 40                       | 11                       |
| ORF3a  | 873                         | 81.11%                          | 99                          | 270                       | 73.17%                           | 44.57%           | 4                                   | 2                         | 5                        | 1                        |
| E      | 3395                        | 26.55%                          | 22                          | 24                        | 52.17%                           | 20.18%           | 1                                   | 0                         | 0                        | 1                        |
| M      | 1423                        | 69.21%                          | 78                          | 58                        | 42.65%                           | 20.33%           | 3                                   | 0                         | 1                        | 2                        |
| ORF6   | 3838                        | 16.96%                          | 17                          | 39                        | 69.64%                           | 30.11%           | 1                                   | 0                         | 4                        | 3                        |
| ORF7a  | 2258                        | 51.15%                          | 43                          | 122                       | 73.94%                           | 45.08%           | 3                                   | 0                         | 11                       | 11                       |
| ORF7b  | 2395                        | 48.18%                          | 10                          | 26                        | 72.22%                           | 27.27%           | 2                                   | 0                         | 4                        | 4                        |
| ORF8   | 1604                        | 65.30%                          | 41                          | 114                       | 73.55%                           | 42.35%           | 1                                   | 1                         | 11                       | 13                       |
| N      | 78                          | 98.31%                          | 175                         | 270                       | 60.67%                           | 35.32%           | 12                                  | 1                         | 15                       | 3                        |
| ORF10  | 4250                        | 8.05%                           | 13                          | 40                        | 75.47%                           | 45.30%           | 0                                   | 0                         | 1                        | 5                        |

232

233 ORF10 and ORF7a harbored the highest mutation density with 45.30% and 45.08% mutations per

234 base, respectively, although only 8.05% of sequences were found to carry mutations in ORF10.

235 On the other hand, 99.98% and 99.96% of sequences had mutations in ORF1ab and S genes, but  
236 their mutation density was lower at 21.36% and 25.21%, respectively. ORF6 was found to be the  
237 most stable gene of SARS-CoV-2 in sequences from Bangladesh, with only 16.96% sequences  
238 carrying the mutations, 30.11% mutations per base and 69.64% missense mutations. ORF3a was  
239 identified to harbor the highest percentage (75.69%) of missense mutations. In comparison, the  
240 least percentage of missense mutations (42.65%) with 22.33% mutations per base was found in  
241 membrane protein-encoding gene M. It was clearly evident that non-structural proteins were  
242 subjected to more missense mutations than non-synonymous mutations compared with structural  
243 proteins (Fig 4C). In addition, we have found several deletions and insertion mutations where both  
244 the highest occurrences were found in the spike protein-coding S gene with 40 unique deletions  
245 and four insertions (Table 1). On the other hand, the highest number of unique stop codons were  
246 present in ORF1ab, with 40 out of 74 total stop codon mutations detected (table 1).

247 Among the 7786 mutations, 6968 were SNP, where 4697 and 2271 were involved in transition and  
248 transversion events, respectively, rendering a transition transversion ratio of 2.07. Transition  
249 mutations were calculated to be more prevalent than expected if mutational events took place  
250 randomly, which clearly revealed the nucleotide substitution bias (Fig 4D). Then, transition  
251 mutation C>U was the most frequent event, being 30.67% of total mutations and 45.50% of  
252 transition mutations, followed by the transversion event G>U, which was 15.37% of the total  
253 mutations (Supplementary file 3).

254

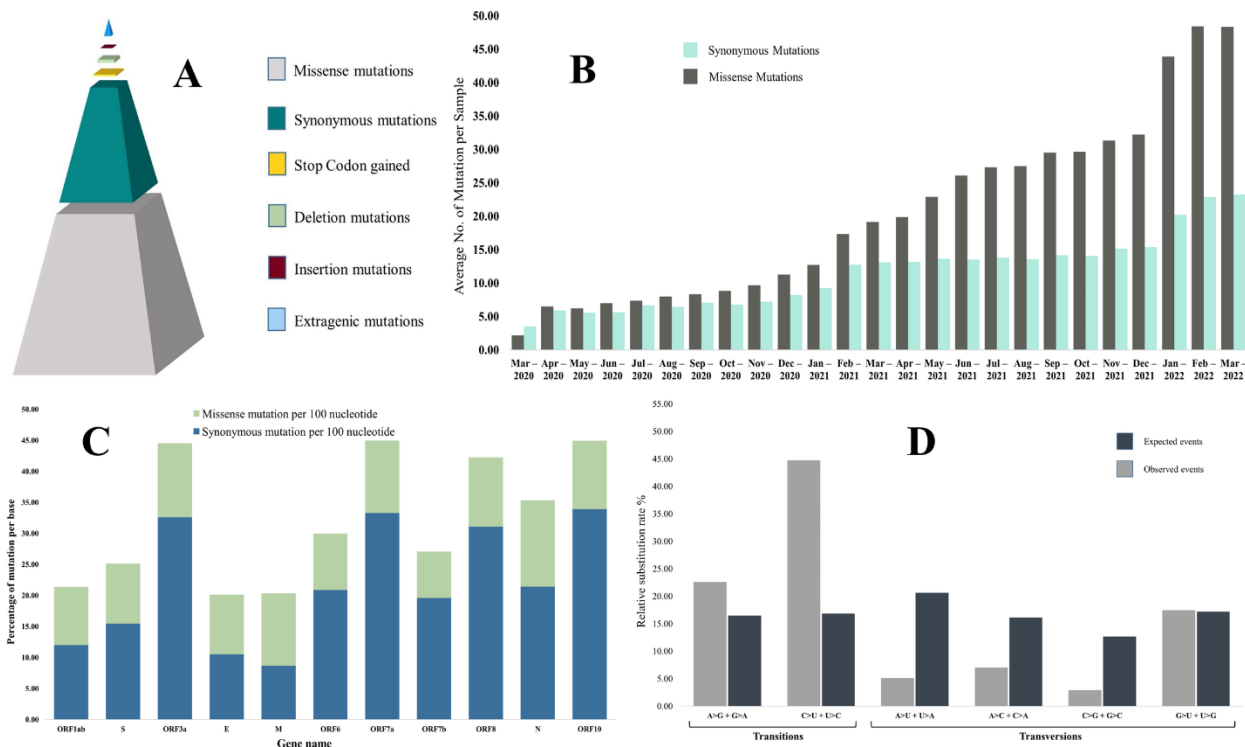

255  
 256 **Fig 4: Summary of mutational events.** **A.** Type of mutations among the sequences. Considering  
 257 all the unique mutations, missense mutations were found to be the most prevalent event. **B.** The  
 258 average number of mutations per sequence in each month. Although the number of mutations  
 259 gradually increased with time, we observed a sharp increase from January 2021 when the Alpha  
 260 variant entered the country. Moreover, more non-synonymous mutations emerged with time than  
 261 synonymous mutations. **C.** Percentage of mutation per base in each gene. ORF3a had the highest  
 262 density of mutations, while Envelop protein is the least mutated. Missense mutations are more  
 263 prevalent than synonymous mutations. **D.** Nucleotide substitution rates for each of the four  
 264 nucleotides among the SARS-CoV-2 genomes. Transition events were more prevalent than  
 265 transversion events. C>U substitution rate was more than three times higher than the expected rate.  
 266  
 267 Then, out of the ten most prevalent mutations in Bangladesh, three were extragenic, one was  
 268 synonymous, and six were missense mutations, where 23403A>G (missense mutation) was the

269 highest prevalent, followed by the second highest 14408C>T (missense mutation) which resembles  
270 the global scenario and these two mutations were accompanied by 3037>C>T (synonymous  
271 mutation). Among the top 7 mutations in the coding region, three were in the spike protein  
272 (D614G, P681R and T478K), two were in the ORF1ab (P4715L and F924F), one was in membrane  
273 protein (I82T), and another was in ORF3a (S26L). These seven mutations had a high prevalence  
274 globally because these belong to different variants of concerns. In addition, 1163A>T (nsp2:  
275 I120F) was a highly prevalent and unique mutation found in Bangladesh from the beginning of the  
276 pandemic while it was absent in other countries. This mutation was present in more than 21% of  
277 sequences. Interestingly enough, from linkage disequilibrium (LD) analysis, we have found that  
278 all the mentioned mutations had a very strong correlation ( $R^2 = 1.00$ ) and occurred in parallel since  
279 their first appearance (Fig 5). 1163A>T mutation was predicted to have been 100% ( $R^2 = 1.00$ )  
280 connected with 20 more mutations in parallel, considering the high frequent mutations present at  
281 least in 10% of our sequence set. Additionally, several other mutations were occurring in parallel  
282 with very strong LD values due to the introduction of several variants of concerns in the country  
283 (Fig 5).  
284





301 sweep due to increased mutations that benefit the strains and lead to the reduction of genetic  
302 variation. In addition, we have found that three genes (ORF3a, ORF7b and ORF10) were under  
303 positive selection pressure or directional selection because the mutations present in them were  
304 advantageous to them; therefore, their frequencies were on the rise while the rest of the genes were  
305 facing negative evolution pressure to stabilize against the deleterious mutations they have got from  
306 random mutational events. Precisely, only 47 sites were facing positive or diversifying selection  
307 pressure against 190 sites found to be under negative or purifying pressure to stabilize the genomic  
308 variations (Supplementary file 3).

309

310 **Table 2: Summary of Mutation's effect on each protein.**

| ORF    | Nucleotide diversity ( $\pi$ ) | dN/dS | No. of sites towards positive selection | No. of sites towards negative selection |
|--------|--------------------------------|-------|-----------------------------------------|-----------------------------------------|
| ORF1ab | 0.0017                         | 0.579 | 28                                      | 103                                     |
| S      | 0.00526                        | 0.74  | 7                                       | 48                                      |
| ORF3a  | 0.00292                        | 1.479 | 2                                       | 11                                      |
| E      | 0.00223                        | 0.479 | 0                                       | 2                                       |
| M      | 0.00206                        | 0.371 | 1                                       | 6                                       |
| ORF6   | 0.00452                        | 0.928 | 5                                       | 18                                      |
| ORF7a  | 0.00549                        | .987  | 0                                       | 3                                       |

|       |         |       |   |    |
|-------|---------|-------|---|----|
| ORF7b | 0.0046  | 1.44  | 0 | 0  |
| ORF8  | 0.01543 | 0.941 | 1 | 9  |
| N     | 0.00579 | 0.841 | 3 | 14 |
| ORF10 | 0.00059 | 1.17  | 0 | 2  |

311 ( $dN/dS > 1$  is positive selection,  $dN/dS = 1$  neutral selection,  $dN/dS < 1$  negative selection,  $dN/dS = 0$  is conserved  
312 region)

313

314

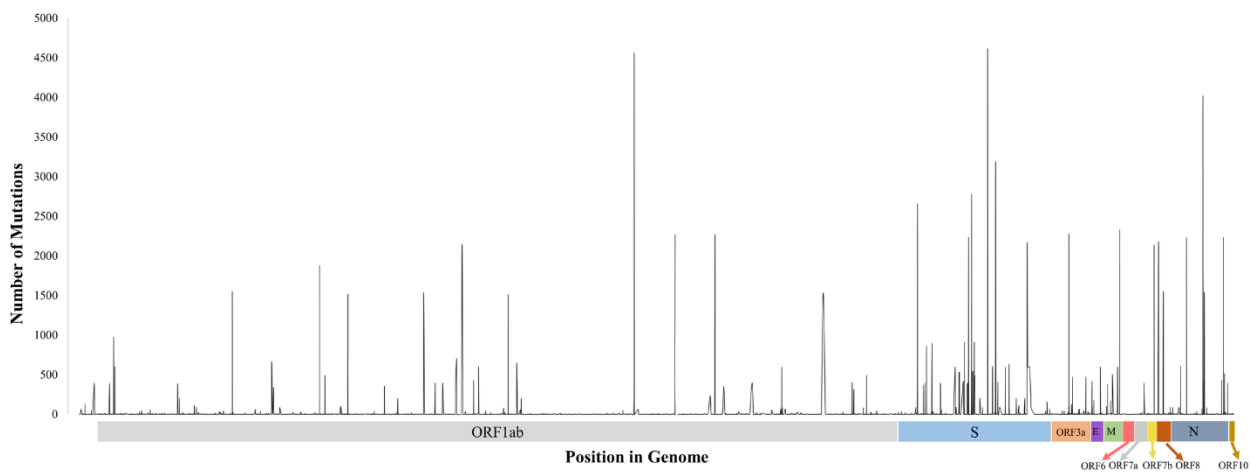

315

316 **Fig 6 Distribution of missense mutations in the genome.** The height of the spikes is proportional  
317 to the number of sequences that got mutation at that location. Regions between these spikes are  
318 stable, which could be targeted for further vaccine and therapeutics development.

319

320 Finally, these mutations affected the virus from the evolutionary perspective and shook the  
321 stability of the proteins they encode. Most of the mutations were previously reported to affect the  
322 stability of the whole proteome of SARS-CoV-2 negatively. However, all the genes were not

323 affected to the same extent by mutational events (Fig 6). For example, only 42.65% of mutations  
324 on the membrane protein-coding M gene were missense which was 73.55% in the case of ORF3a  
325 (table 1). As of now, vaccines and therapies target the spike protein, which is highly mutated.  
326 That's one reason why people continue to develop symptoms after successful vaccination. It is  
327 possible that current vaccines and therapies will not work in future due to a high number of  
328 mutations occurring. The less affected genes could therefore be targeted for medicine and vaccine  
329 development. Figure 6 shows spikes that represent mutations, and the height of the spikes is  
330 proportional to the number of mutations that have taken place at that position in the genome. As  
331 we can see, there are plenty of stable regions between the spikes, which could be targeted for  
332 therapeutics and vaccine development against SARS-CoV-2.

333

## 334 **Discussion**

335 SARS-CoV-2 has been circulating in Bangladesh for over two years, and many strains are  
336 sequenced from different parts of the country, helping us carry out downstream analysis to depict  
337 different variants, transmission, and evolution inside the country. Investigating 4622 whole-  
338 genome sequences from Bangladesh, we have seen B.1.1.25 lineage was in dominance since the  
339 beginning along with other lineages containing a small number of sequences, but since March  
340 2021, strains from B.1.1.25 lineage are surmounted by another lineage B.1.351.3, which is a sub-  
341 line of Beta variant. In addition to that, we have observed a slight increase of Alpha variants for a  
342 short time since their first appearance in January 2021. However, In April 2021 Delta variant  
343 emerged and dominated other variants until the arrival of Omicron. The Omicron variant  
344 comprises three main sub-lineages termed BA.1, BA.2 and BA.3. Both BA.1 and BA.2 are found  
345 in Bangladesh, and currently, BA.2 is the dominant variant. Although BA.1 and BA.2 have

346 numerous mutations in common, 20 mutations in the spike protein differentiate the two sub-  
347 lineages, and BA.2 also displays a marked decreased sensitivity to many neutralizing monoclonal  
348 antibodies (mAbs) when compared to previous VOCs (37). Therefore, with further mutations, this  
349 BA.2 sub-lineage is keeping the risk of having another COVID-19 wave alive in the country.

350 On the other hand, geographical analysis depicts Dhaka and Chattogram containing a more  
351 diversified number of sequences than other parts of the country. Our analysis has limitations at  
352 this point because we had a higher number of sequences from these two regions than others. The  
353 sequences were more diversified in the first phase of the pandemic. However, with the arrival of  
354 the Delta and Omicron variants, the divergence reduced drastically, maybe due to viral adaptation  
355 following the "Survival of the fittest" theory of natural selection, although we have found several  
356 sub-lineages of the Delta variant. Additionally, we have seen Dhaka being the viral transmission  
357 hub, which is obvious since it is the capital city of Bangladesh, but this city is not the only  
358 transmission source. From extensive analysis, we have built the SARS-CoV-2 transmission  
359 network between different administrative divisions and observed the back and forth transmission  
360 of the virus inside Bangladesh. This situation arose due to a lack of restriction on the mass  
361 movement; public gatherings were not limited duly, and other socioeconomic events.

362 From the mutational perspective, we have seen a total of 7659 unique mutations present in 4622  
363 sequences with 37.64 mutations per sample where on average 24.61 were coding variants, which  
364 happens to be significantly higher than the global average of 7.23, reported in July 2020 (38). This  
365 sharp rise of mutations indicates the SARS-CoV-2 might be facing strong challenges from the  
366 host's immunologic response in addition to random regular mutational events of RNA viruses,  
367 which is one of the reasons for the emergence of new variants of concerns. At the nucleotide level,  
368 67.41% of the mutations were transition events, and a molecular bias was present for C>U, which

369 tends to mutate hydrophilic amino acids into hydrophobic ones (36). Overall, 1109 unique C>U  
370 missense mutation on the genome was observed, where 194, 289, and 162 of the mutations were  
371 skewed towards phenylalanine, isoleucine, and leucine codons, respectively. Moreover, 236 C>U  
372 mutations were involved in altering the proline, which is known to be a strong helix breaker (39).  
373 Therefore, proline to another amino acid shift might have a deleterious effect on the SARS-CoV-  
374 2 proteome.

375 On the other hand, we have found that most of the genes were under negative selection pressure  
376 while only three non-structural protein-coding genes were under Darwinian (positive) selection,  
377 which indicates that most of the random mutational events were deleterious for the SARS-CoV-2  
378 (40), maybe due to the immunologic potential of people of Bangladesh and our demography.  
379 However, the dN/dS ratio of the receptor-binding region (RBD) of the spike protein was higher,  
380 indicating that mutations in this region were advantageous. The result correlates with the  
381 emergence of different variants of concerns like Alpha, Beta, Delta and Omicron. The RBD region  
382 is considered the most important part of the virus since it attaches to ACE2 during viral infection  
383 to host cells. Those advantageous mutations might increase pathogenicity, infectivity,  
384 transmissibility, and letting it evade the host immunity (41–43). Moreover, most of the current  
385 therapies and vaccines are developed targeting the BRD-ACE2 interaction. Therefore, a higher  
386 dN/dS ratio also warns us about the emergence of new deadly variants in future with further  
387 mutations in this region and vaccine failure. However, analyzing all the sequences from  
388 Bangladesh, we have seen that the whole proteome was not affected to the same extent. There were  
389 regions of high and low nucleotide diversity. While highly affected regions are evolving faster,  
390 regions with low nucleotide divergence would render us the opportunity to develop new vaccines

391 and antibodies for treatment and development detection kits to reduce the number of false test  
392 reports during this pandemic.

393 To sum up, considering the limitations regarding sequence number variations in different parts of  
394 the country, we have analyzed all the unique and global mutations present in Bangladesh, which  
395 are thoroughly reported in the supplementary files. This data would facilitate researchers further  
396 from various perspectives like investigating viral transmission, the connection among isolates,  
397 evolution patterns, and dynamics of divergence of the virus.

398

## 399 **Methods and materials**

### 400 **Sequence retrieval and Lineage determination**

401 Using completeness and coverage filters on the sequences, all the SARS-CoV-2 genomes  
402 submitted from Bangladesh until 25th March 2022 were retrieved from the Global Initiative on  
403 Sharing All Influenza Data (GISAID) database ([www.gisaid.org](http://www.gisaid.org)) (9). Prior to downstream  
404 analysis, all sequences were quality checked and sequences with more than 5% ambiguous  
405 characters were omitted. The sorted sequences were then classified by Phylogenetic Assignment  
406 of Named Global Outbreak LINEages (Pangolin) with COVID-19 Lineage Assigner  
407 (<https://pangolin.cog-uk.io/>) (20). Furthermore, we excluded lineages carrying less than ten  
408 sequences to address the important lineages. We analyzed and visualized the sequence lineage  
409 distribution in R within the country.

### 410 **Transmission analysis:**

411 First, the selected sequences were aligned using the Mafft algorithm (21), followed by the  
412 construction of a maximum likelihood phylogenetic tree using IQ-TREE (22) and calibrating the

413 tree based on time with TreeTime (23). Using the StrainHub tool (24), we built the SARS-CoV-2  
414 transmission network in Bangladesh from the reconstructed tree and metadata.

#### 415 **Mutation Analysis:**

416 We have aligned each sequence with the reference sequence (NC\_045512.2) (8) using the  
417 minimap2 algorithm (25) and called the variants with Samtools (26). Additionally, SNP-sites (27),  
418 CovSeq (28) and an online server Coronapp (29) were used to detect the mutations present in the  
419 sequences and the common mutations from these four sources were considered. Finally, SNPeff  
420 was used to predict the impact of the mutations (30).

#### 421 **Effects of mutation:**

422 First of all, we used TASSEL software (31) to determine the nucleotide diversity ( $\pi$ ) using a 20  
423 base-pair window at five base-pair steps. Then we calculated the direction of selection in the  
424 sequences to know if diversity moves away from neutrality and to understand the pattern of  
425 evolution using the SLAC algorithm (32) in the HyPhy software package (33). Linkage  
426 disequilibrium among mutations prevalent in 10% or more sequences were calculated using  
427 AutoVem (34) and presented by the R2 index using HaploView (35). Then, along with determining  
428 the nucleotide substitution bias, the expected and observed transition, transversion events as well  
429 as their ratio were calculated by the method used by Matyášek R, Kovařík A (36).

430

#### 431 **Acknowledgements**

432 The authors are grateful for the efforts of all research institutes in Bangladesh in continuously  
433 sequencing the SARS-CoV-2 virus to track its changes and provide access to the data. We also  
434 would like to express our gratitude to all scientists, researchers, and health care workers around  
435 the world for their valuable contribution to the fight against this pandemic.



## 436 Reference

- 437 1. Zhu N, Zhang D, Wang W, Li X, Yang B, Song J, Zhao X, Huang B, Shi W, Lu R, Niu P,  
438 Zhan F, Ma X, Wang D, Xu W, Wu G, Gao GF, Tan W. 2020. A Novel Coronavirus from  
439 Patients with Pneumonia in China, 2019. *N Engl J Med* 382:727–733.
- 440 2. Dong E, Du H, Gardner L. 2020. An interactive web-based dashboard to track COVID-19  
441 in real time. *Lancet Infect Dis* [https://doi.org/10.1016/S1473-3099\(20\)30120-1](https://doi.org/10.1016/S1473-3099(20)30120-1).
- 442 3. Cui J, Li F, Shi ZL. 2019. Origin and evolution of pathogenic coronaviruses. *Nat Rev*  
443 *Microbiol* <https://doi.org/10.1038/s41579-018-0118-9>.
- 444 4. Zhou P, Yang X Lou, Wang XG, Hu B, Zhang L, Zhang W, Si HR, Zhu Y, Li B, Huang  
445 CL, Chen HD, Chen J, Luo Y, Guo H, Jiang R Di, Liu MQ, Chen Y, Shen XR, Wang X,  
446 Zheng XS, Zhao K, Chen QJ, Deng F, Liu LL, Yan B, Zhan FX, Wang YY, Xiao GF, Shi  
447 ZL. 2020. A pneumonia outbreak associated with a new coronavirus of probable bat  
448 origin. *Nature* 579:270–273.
- 449 5. Kandeel M, Ibrahim A, Fayez M, Al-Nazawi M. 2020. From SARS and MERS CoVs to  
450 SARS-CoV-2: Moving toward more biased codon usage in viral structural and  
451 nonstructural genes. *J Med Virol* 92:660–666.
- 452 6. Naqvi AAT, Fatima K, Mohammad T, Fatima U, Singh IK, Singh A, Atif SM, Hariprasad  
453 G, Hasan GM, Hassan MI. 2020. Insights into SARS-CoV-2 genome, structure, evolution,  
454 pathogenesis and therapies: Structural genomics approach. *Biochim Biophys Acta - Mol*  
455 *Basis Dis* <https://doi.org/10.1016/j.bbadis.2020.165878>.
- 456 7. Andersen KG, Rambaut A, Lipkin WI, Holmes EC, Garry RF. 2020. The proximal origin  
457 of SARS-CoV-2. *Nat Med* <https://doi.org/10.1038/s41591-020-0820-9>.
- 458 8. Wu F, Zhao S, Yu B, Chen YM, Wang W, Song ZG, Hu Y, Tao ZW, Tian JH, Pei YY,

- 459 Yuan ML, Zhang YL, Dai FH, Liu Y, Wang QM, Zheng JJ, Xu L, Holmes EC, Zhang YZ.  
460 2020. A new coronavirus associated with human respiratory disease in China. *Nature*  
461 579:265–269.
- 462 9. Elbe S, Buckland-Merrett G. 2017. Data, disease and diplomacy: GISAID’s innovative  
463 contribution to global health. *Glob Challenges* 1:33–46.
- 464 10. Worldometer. 2021. COVID Live Update: 239,169,612 Cases and 4,875,781 Deaths from  
465 the Coronavirus. Worldometer.
- 466 11. Islam MT, Talukder AK, Siddiqui MN, Islam T. 2020. Tackling the COVID-19 pandemic:  
467 The Bangladesh perspective. *J Public health Res* 9:389–397.
- 468 12. Saha S, Malaker R, Sajib MSI, Hasanuzzaman M, Rahman H, Ahmed ZB, Islam MS,  
469 Islam M, Hooda Y, Ahyong V, Vanaerschot M, Batson J, Hao S, Kamm J, Kistler A, Tato  
470 CM, DeRisi JL, Saha SK. 2020. Complete Genome Sequence of a Novel Coronavirus  
471 (SARS-CoV-2) Isolate from Bangladesh. *Microbiol Resour Announc* 9.
- 472 13. Choi JY, Smith DM. 2021. SARS-CoV-2 variants of concern. *Yonsei Med J*  
473 <https://doi.org/10.3349/ymj.2021.62.11.961>.
- 474 14. Sanyaolu A, Okorie C, Marinkovic A, Haider N, Abbasi AF, Jaferi U, Prakash S,  
475 Balendra V. 2021. The emerging SARS-CoV-2 variants of concern. *Ther Adv Infect Dis*  
476 <https://doi.org/10.1177/20499361211024372>.
- 477 15. Ogando NS, Zevenhoven-Dobbe JC, van der Meer Y, Bredenbeek PJ, Posthuma CC,  
478 Snijder EJ. 2020. The Enzymatic Activity of the nsp14 Exoribonuclease Is Critical for  
479 Replication of MERS-CoV and SARS-CoV-2. *J Virol* 94.
- 480 16. Gribble J, Stevens LJ, Agostini ML, Anderson-Daniels J, Chappell JD, Lu X, Pruijssers  
481 AJ, Routh AL, Denison MR. 2021. The coronavirus proofreading exoribonuclease

- 482 mediates extensive viral recombination. *PLoS Pathog* 17.
- 483 17. Duchêne S, Ho SY, Holmes EC. 2015. Declining transition/transversion ratios through  
484 time reveal limitations to the accuracy of nucleotide substitution models. *BMC Evol Biol*  
485 15.
- 486 18. Shishir TA, Naser I Bin, Faruque SM. 2021. In silico comparative genomics of SARS-  
487 CoV-2 to determine the source and diversity of the pathogen in Bangladesh. *PLoS One* 16.
- 488 19. Rahman MM, Kader SB, Rizvi SMS. 2021. Molecular characterization of SARS-CoV-2  
489 from Bangladesh: implications in genetic diversity, possible origin of the virus, and  
490 functional significance of the mutations. *Heliyon* 7:e07866.
- 491 20. O'Toole Á, Scher E, Underwood A, Jackson B, Hill V, McCrone JT, Colquhoun R, Ruis  
492 C, Abu-Dahab K, Taylor B, Yeats C, du Plessis L, Maloney D, Medd N, Attwood SW,  
493 Aanensen DM, Holmes EC, Pybus OG, Rambaut A. 2021. Assignment of epidemiological  
494 lineages in an emerging pandemic using the pangolin tool. *Virus Evol* 7.
- 495 21. Katoh K, Rozewicki J, Yamada KD. 2018. MAFFT online service: Multiple sequence  
496 alignment, interactive sequence choice and visualization. *Brief Bioinform* 20:1160–1166.
- 497 22. Minh BQ, Schmidt HA, Chernomor O, Schrempf D, Woodhams MD, Von Haeseler A,  
498 Lanfear R, Teeling E. 2020. IQ-TREE 2: New Models and Efficient Methods for  
499 Phylogenetic Inference in the Genomic Era. *Mol Biol Evol* 37:1530–1534.
- 500 23. Sagulenko P, Puller V, Neher RA. 2018. TreeTime: Maximum-likelihood phylodynamic  
501 analysis. *Virus Evol* 4.
- 502 24. De Bernardi Schneider A, Ford CT, Hostager R, Williams J, Cioce M, Çatalyürek Ü V.,  
503 Wertheim JO, Janies D. 2020. StrainHub: A phylogenetic tool to construct pathogen  
504 transmission networks. *Bioinformatics* 36:945–947.

- 505 25. Li H. 2018. Minimap2: Pairwise alignment for nucleotide sequences. *Bioinformatics*  
506 34:3094–3100.
- 507 26. Li H, Handsaker B, Wysoker A, Fennell T, Ruan J, Homer N, Marth G, Abecasis G,  
508 Durbin R. 2009. The Sequence Alignment/Map format and SAMtools. *Bioinformatics*  
509 25:2078–2079.
- 510 27. Page AJ, Taylor B, Delaney AJ, Soares J, Seemann T, Keane JA, Harris SR. 2016. SNP-  
511 sites: rapid efficient extraction of SNPs from multi-FASTA alignments. *Microb genomics*  
512 2:e000056.
- 513 28. Simonetti M, Zhang N, Harbers L, Milia MG, Brossa S, Huong Nguyen TT, Cerutti F,  
514 Berrino E, Sapino A, Bienko M, Sottile A, Ghisetti V, Crosetto N. 2021. COVseq is a  
515 cost-effective workflow for mass-scale SARS-CoV-2 genomic surveillance. *Nat Commun*  
516 12.
- 517 29. Mercatelli D, Triboli L, Fornasari E, Ray F, Giorgi FM. 2021. Coronapp: A web  
518 application to annotate and monitor SARS-CoV-2 mutations. *J Med Virol* 93:3238–3245.
- 519 30. Cingolani P, Platts A, Wang LL, Coon M, Nguyen T, Wang L, Land SJ, Lu X, Ruden  
520 DM. 2012. A program for annotating and predicting the effects of single nucleotide  
521 polymorphisms, SnpEff: SNPs in the genome of *Drosophila melanogaster* strain w1118;  
522 iso-2; iso-3. *Fly (Austin)* 6:80–92.
- 523 31. Bradbury PJ, Zhang Z, Kroon DE, Casstevens TM, Ramdoss Y, Buckler ES. 2007.  
524 TASSEL: Software for association mapping of complex traits in diverse samples.  
525 *Bioinformatics* 23:2633–2635.
- 526 32. Kosakovsky Pond SL, Frost SDW. 2005. Not so different after all: A comparison of  
527 methods for detecting amino acid sites under selection. *Mol Biol Evol* 22:1208–1222.

- 528 33. Kosakovsky Pond SL, Poon AFY, Velazquez R, Weaver S, Hepler NL, Murrell B, Shank  
529 SD, Magalis BR, Bouvier D, Nekrutenko A, Wisotsky S, Spielman SJ, Frost SDW, Muse  
530 S V. 2020. HyPhy 2.5 - A Customizable Platform for Evolutionary Hypothesis Testing  
531 Using Phylogenies. *Mol Biol Evol* 37:295–299.
- 532 34. Xi B, Jiang D, Li S, Lon JR, Bai Y, Lin S, Hu M, Meng Y, Qu Y, Huang Y, Liu W,  
533 Huang L, Du H. 2021. AutoVEM: An automated tool to real-time monitor epidemic trends  
534 and key mutations in SARS-CoV-2 evolution. *Comput Struct Biotechnol J* 19:1976–1985.
- 535 35. Barrett JC, Fry B, Maller J, Daly MJ. 2005. Haploview: Analysis and visualization of LD  
536 and haplotype maps. *Bioinformatics* 21:263–265.
- 537 36. Matyášek R, Kovařík A. 2020. Mutation patterns of human SARS-CoV-2 and bat  
538 RATG13 coronavirus genomes are strongly biased towards C>U transitions, indicating  
539 rapid evolution in their hosts. *Genes (Basel)* 11:1–13.
- 540 37. Planas, D., Saunders, N., Maes, P. et al. Considerable escape of SARS-CoV-2 Omicron to  
541 antibody neutralization. *Nature* 602:671–675
- 542 38. Mercatelli D, Giorgi FM. 2020. Geographic and Genomic Distribution of SARS-CoV-2  
543 Mutations. *Front Microbiol* 11.
- 544 39. Li SC, Goto NK, Williams KA, Deber CM. 1996.  $\alpha$ -Helical, but not  $\beta$ -sheet, propensity of  
545 proline is determined by peptide environment. *Proc Natl Acad Sci U S A* 93:6676–6681.
- 546 40. Lin JJ, Bhattacharjee MJ, Yu CP, Tseng YY, Li WH. 2019. Many human RNA viruses  
547 show extraordinarily stringent selective constraints on protein evolution. *Proc Natl Acad*  
548 *Sci U S A* 116:19009–19018.
- 549 41. Lan J, Ge J, Yu J, Shan S, Zhou H, Fan S, Zhang Q, Shi X, Wang Q, Zhang L, Wang X.  
550 2020. Structure of the SARS-CoV-2 spike receptor-binding domain bound to the ACE2

- 551 receptor. *Nature* 581:215–220.
- 552 42. Barros EP, Casalino L, Gaieb Z, Dommer AC, Wang Y, Fallon L, Raguetta L, Belfon K,  
553 Simmerling C, Amaro RE. 2021. The flexibility of ACE2 in the context of SARS-CoV-2  
554 infection. *Biophys J* 120:1072–1084.
- 555 43. Xu C, Wang Y, Liu C, Zhang C, Han W, Hong X, Wang Y, Hong Q, Wang S, Zhao Q,  
556 Wang Y, Yang Y, Chen K, Zheng W, Kong L, Wang F, Zuo Q, Huang Z, Cong Y. 2021.  
557 Conformational dynamics of SARS-CoV-2 trimeric spike glycoprotein in complex with  
558 receptor ACE2 revealed by cryo-EM. *Sci Adv* 7.
- 559
